# Supplementary material for: Phosphorus adsorption from aqueous solutions using different types of cement: kinetics, isotherms, and mechanisms
Source: Royal Society of Chemistry journal article supplement (doi:10.1039/d4ra01929f), 2024-01-01
Supplement: d4ra01929f1.pdf [file d4ra01929f1.pdf]

**Supplementary Materials for**

**Phosphorus adsorption from aqueous  
solutions using different types of cement:  
Kinetics, isotherms, and mechanisms**

*Xingyu Yu<sup>a, b, c</sup>, Yongqiang Yang<sup>\*a, b</sup>, Hanxiao Zhang<sup>a, b, c</sup>, Shijun Wu<sup>a, b</sup>, Fanrong Chen<sup>a, b</sup>, Runliang Zhu<sup>a, b</sup>*

<sup>a</sup> *CAS Key Laboratory of Mineralogy and Metallogeny & Guangdong Provincial Key Laboratory of Mineral Physics and Materials, Guangzhou Institute of Geochemistry, Chinese Academy of Sciences, 511 Kehua Street, 510640 Guangzhou, China.*

<sup>b</sup> *CAS Center for Excellence in Deep Earth Science, 511 Kehua Street, 510640 Guangzhou, China.*

<sup>c</sup> *University of Chinese Academy of Sciences, 19 Yuquan Road, 100049 Beijing, China.*

*\*Corresponding author E-mail: yqyang@gig.ac.cn (Yongqiang Yang)*

## Supplementary Note 1 | Materials and Methods

### **Point of zero charge**

The point of zero charge ( $\text{pH}_{\text{PZC}}$ ) was determined using the pH drift method. The initial pH value of 0.1 M NaCl solution was adjusted to 6, 8, 10, 12, and 13 using 0.1 mol/L NaOH and 0.1 mol/L HCl, with the volume fixed to 20 mL. Subsequently, 0.2 g of sample was added, and the mixture was shaken at 25 °C for 12 hours. The final pH of the supernatant was then recorded. The point at which the difference in pH ( $\Delta\text{pH}=\text{pH}_{\text{Initial}}-\text{pH}_{\text{Final}}$ ) equals zero represents the zero charge point.

### **BET surface area**

The Micromeritics ASAP2460 Surface Area and Porosimetry Analyzer was used to analyze the  $\text{N}_2$  adsorption-desorption isotherms (77.3 K) and BET-specific surface area of the adsorbents. Accurately weighed samples were placed in the test container, following which the adsorbents underwent degassing under vacuum at 200 °C for 2.5 h.

Supplementary Note 2 | Figures and Table

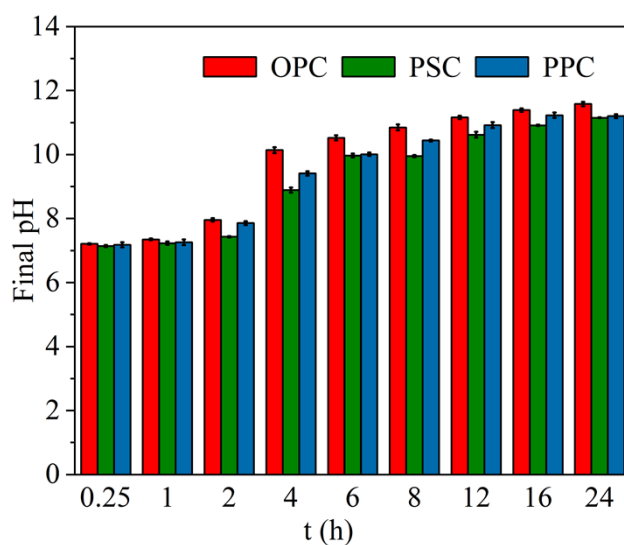

**Fig. S1** Temporal variation of solution pH for kinetic models.

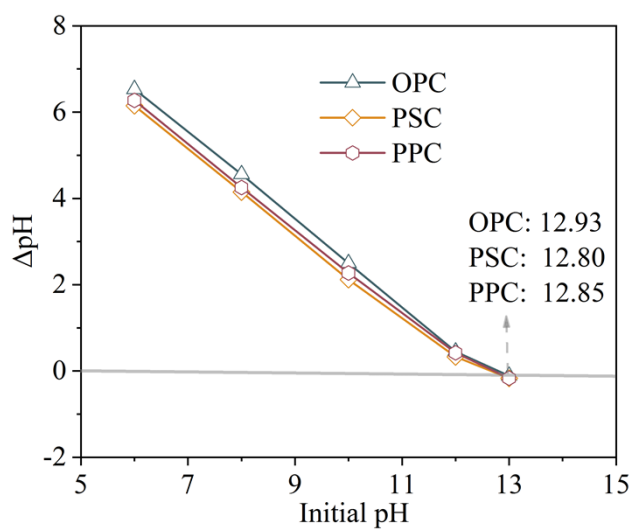

**Fig. S2** Plot of  $\Delta$ pH versus initial pH for  $pH_{PZC}$ 's determination of cements. Reaction time: 12 h;

Background electrolyte: 0.1 M NaCl; Adsorbent dosage: 10 g/L.

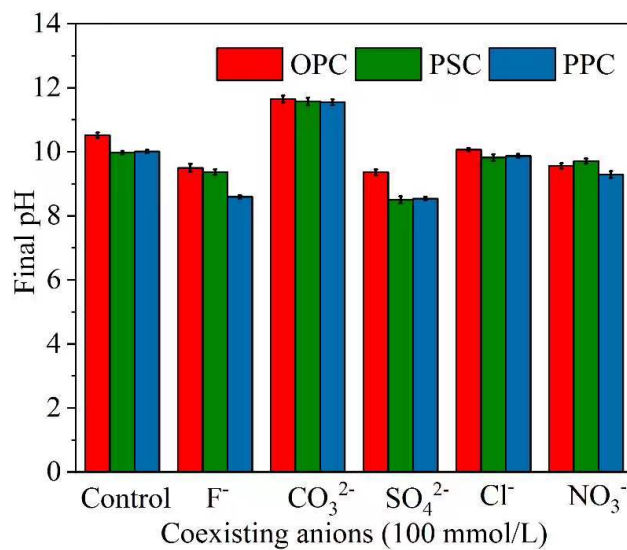

**Fig. S3** Variation of solution pH in coexisting anions adsorption experiment.

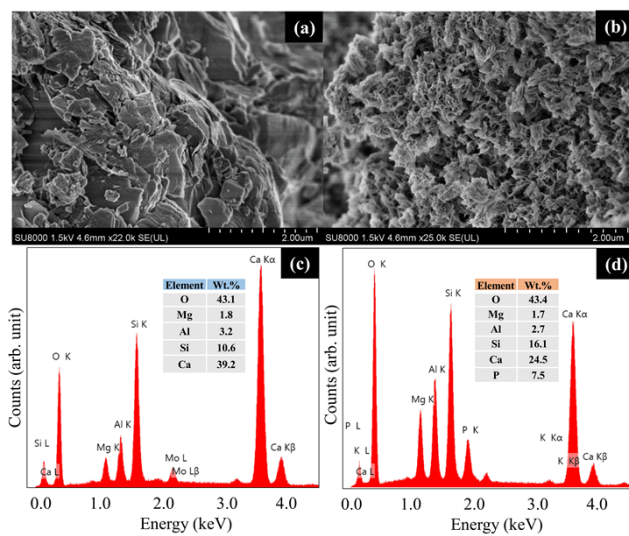

**Fig. S4** SEM images of PSC (a) before and (b) after P adsorption and EDS spectra of PSC (c) before and (d) after P adsorption.

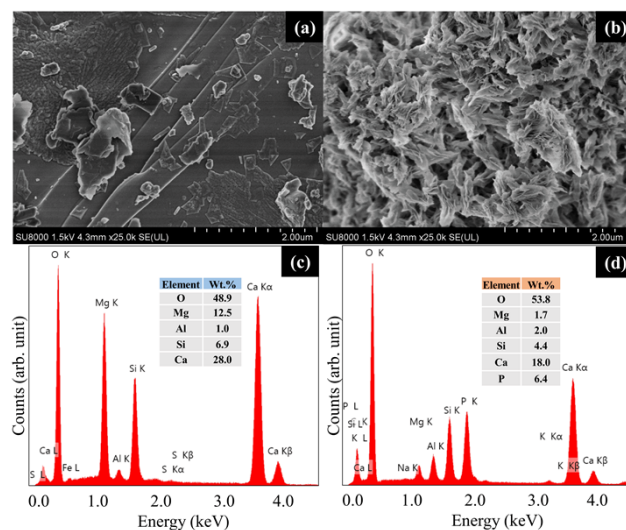

**Fig. S5** SEM images of PPC (a) before and (b) after P adsorption and EDS spectra of PPC (c) before and (d) after P adsorption.

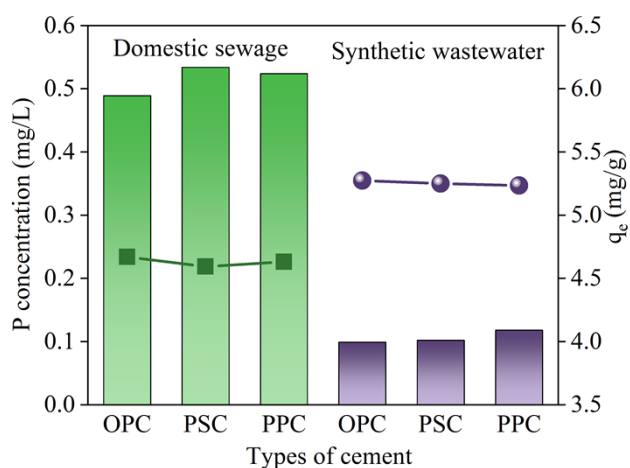

**Fig. S6** Effect of water type on P adsorption by cement. Initial P concentration: 5.18 mg/L (domestic sewage) and 5.4 mg/L (synthetic wastewater); Temperature: 25°C; Reaction time: 24 h; Adsorbent dosage: 1 g/L.

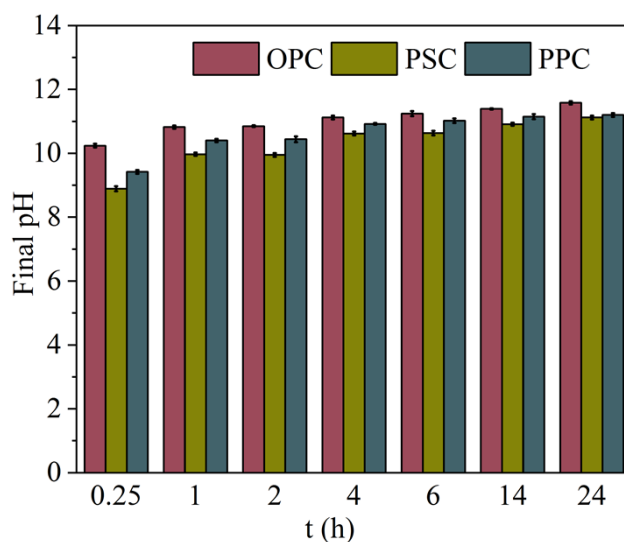

**Fig. S7** Temporal variation of solution pH during adsorption experiment with domestic sewage.



---

**Table S1** The specific surface area of cements.

---

| Sample | BET surface area (m <sup>2</sup> /g) |
|--------|--------------------------------------|
| OPC    | 1.13                                 |
| PSC    | 1.46                                 |
| PPC    | 2.33                                 |
